# Supplementary material for: Diagnostic value of microRNAs in asbestos exposure and malignant mesothelioma: systematic review and qualitative meta-analysis
Source: PubMed Central journal article supplement (PMC5295457; doi:10.18632/oncotarget.9686), 2016-06-01
Supplement: oncotarget-07-58606-s001.pdf [file oncotarget-07-58606-s001.pdf]

# Diagnostic value of microRNAs in asbestos exposure and malignant mesothelioma: systematic review and qualitative meta-analysis

## Supplementary Material

### Methods

#### 1. Potential biases in the review process

The study was conducted in accordance with the PRISMA checklist [1], a system that improves the clarity and transparency of the systematic review approach. The PRISMA checklist has been developed for randomized trials [2], but it can also be useful as a basis for reporting systematic reviews of other kinds of research [1]. The 11-item AMSTAR (assessment of multiple systematic reviews) tool was also applied, to evaluate the methodological quality of systematic reviews [3]. The PRISMA and AMSTAR checklists are shown in **Supplementary Table 1** and **Supplementary Table 2**, respectively. Even with all these precautions, the possibility of publication bias remains; for example manuscripts that are suitable for publication in scientific journals are more likely to report statistically significant data [4–6]. Due to the small size of studies investigating diagnostic value of circulating miRNAs in MM, we did not evaluate publication bias using a funnel plot.

#### 2. Details about the specially devised vote-counting strategy

Our scoring method was established *a priori* by three investigators. The method considers the direction of deregulation as well as the following 4 features: the number of studies reporting each miRNA as deregulated; the total number of MM samples; the total number of normal samples used; and the number of qRT-PCR series conducted to assess each miRNA. The latter characteristic has been taken into account because some authors have carried out the qRT-PCR analysis in different cohorts of samples (*e.g.* Discovery set, Training set and Validation set [79], see study design in

**Table 2)** and therefore performing more than one qRT-PCR series to evaluate miRNAs expression in the same study.

A value was attributed to each miRNA by assigning a score for each of the 4 features. We adopted quartiles, which divide an ordered data series into four equal parts, to set up a five-point scale for the number of samples used. In brief, each feature was given a score based on the quartile of the distribution it occupied: 0, the lowest value (Min); 1, the lower quartile (Q1); 2, the median quartile (Q2); 3, the upper quartile (Q3); and 4, the highest value (Max). The quartile rankings of each feature were calculated for (a) and (c) comparison categories, *i.e.* MM tissue *vs.* normal or non-cancer tissue and (c) MM blood samples *vs.* normal blood samples. However, since quartiles are typically calculated for lists with a minimum of 20 items, the approach could be used only for the number of MM or normal samples used. Thus, a 0-4 scale was used to assign a score to the number of qRT-PCR assays performed: 1 qRT-PCR, 0; 2 qRT-PCRs, 1; 4 qRT-PCRs, 2; 5 qRT-PCRs, 3; and 6 qRT-PCRs, 4. Finally, for the number of studies reporting the same miRNA, 1 point was awarded for report in one paper and 2 points for report in two or more papers. The 4 scores were added to obtain a final score for each miRNA, and quartiles were again calculated from their distribution. The following **Tables (A and B)** display the scoring scheme for tissue miRNAs and circulating miRNAs, respectively. Results are reported as a box-whisker plot, where each dot represents a miRNA (**Figure 2**). The miRNAs belonging to groups Q3 and Max were considered as the most significant.

**Table A.** Scoring table of tissue MM-miRNAs from qRT-PCR analyses.

| Accession number              | miRBase ID                         | miRNAs             | No. of qRT-PCR | qRT-PCR score | MM   | MM score | H    | H score | Ref        | Ref score | miRNA Vote |
|-------------------------------|------------------------------------|--------------------|----------------|---------------|------|----------|------|---------|------------|-----------|------------|
| MIMAT0000416                  | hsa-miR-1-3p                       | miR-1              | 1              | 0             | 25   | 1        | 6    | 0       | [75]       | 1         | 2          |
| MIMAT0000099                  | hsa-miR-101-3p                     | miR-101            | 1              | 0             | n.a. | 0        | n.a. | 0       | [93]       | 1         | 1          |
| MIMAT0000445                  | hsa-miR-126-3p                     | miR-126            | 5              | 3             | 59   | 3        | 51   | 3       | [85], [77] | 2         | 11         |
| MIMAT0000435                  | hsa-miR-143-3p                     | miR-143            | 4              | 2             | 32   | 2        | 24   | 3       | [77]       | 1         | 8          |
| MIMAT0000437                  | hsa-miR-145-5p                     | miR-145            | 6              | 4             | 74   | 3        | 74   | 3       | [76], [77] | 2         | 12         |
| MIMAT0004658                  | hsa-miR-155-3p                     | miR-155*           | 1              | 0             | 25   | 1        | 6    | 0       | [75]       | 1         | 2          |
| MIMAT0000068                  | hsa-miR-15a-5p                     | miR-15a-5p         | 1              | 0             | 60   | 3        | 23   | 2       | [94]       | 1         | 6          |
| MIMAT0000417                  | hsa-miR-15b-5p                     | miR-15b-5p         | 1              | 0             | 60   | 3        | 23   | 2       | [94]       | 1         | 6          |
| MIMAT0000069                  | hsa-miR-16-5p                      | miR-16 / miR-16-5p | 2              | 1             | 78   | 3        | 30   | 3       | [90], [94] | 2         | 9          |
| MIMAT0000070                  | hsa-miR-17-5p                      | miR-17-5p          | 1              | 0             | 32   | 2        | 24   | 3       | [83]       | 1         | 6          |
| MIMAT0007890                  | miR-1914-3p                        | miR-1914-3p        | 1              | 0             | 18   | 1        | 7    | 0       | [90]       | 1         | 2          |
| MIMAT0000222                  | hsa-miR-192-5p                     | miR-192            | 2              | 1             | 120  | 4        | 23   | 2       | [99]       | 1         | 8          |
| MIMAT0000459                  | hsa-miR-193a-3p                    | miR-193a-3p        | 2              | 1             | 120  | 4        | 23   | 2       | [99]       | 1         | 8          |
| MIMAT0000461                  | hsa-miR-195-5p                     | miR-195-5p         | 1              | 0             | 60   | 3        | 23   | 2       | [94]       | 1         | 6          |
| MIMAT0001080                  | hsa-miR-196b-5p                    | miR-196b           | 1              | 0             | 18   | 1        | 7    | 0       | [90]       | 1         | 2          |
| MIMAT0000318                  | hsa-miR-200b-3p                    | miR-200b           | 2              | 1             | 120  | 4        | 23   | 2       | [99]       | 1         | 8          |
| MIMAT0000264                  | hsa-miR-203a-3p                    | miR-203            | 2              | 1             | 120  | 4        | 23   | 2       | [99]       | 1         | 8          |
| MIMAT0000462                  | hsa-miR-206                        | miR-206            | 1              | 0             | 25   | 1        | 6    | 0       | [75]       | 1         | 2          |
| MIMAT0000278                  | hsa-miR-221-3p                     | miR-221            | 1              | 0             | 32   | 2        | 24   | 3       | [83]       | 1         | 6          |
| MIMAT0000280                  | hsa-miR-223-3p                     | miR-223            | 2              | 1             | 17   | 1        | 6    | 0       | [98]       | 1         | 3          |
| MIMAT0000082                  | hsa-miR-26a-5p                     | miR-26a            | 1              | 0             | n.a. | 0        | n.a. | 0       | [93]       | 1         | 1          |
| MIMAT0004681                  | hsa-miR-26a-2-3p                   | miR-26a-2-3p       | 1              | 0             | 18   | 1        | 7    | 0       | [90]       | 1         | 2          |
| MIMAT0004673                  | hsa-miR-29c-5p                     | miR-29c*           | 1              | 0             | 18   | 1        | 7    | 0       | [90]       | 1         | 2          |
| MIMAT0000089                  | hsa-miR-31-5p                      | miR-31             | 1              | 0             | 25   | 1        | 20   | 2       | [97]       | 1         | 4          |
| MIMAT0000090                  | hsa-miR-32-5p                      | miR-32             | 1              | 0             | 27   | 2        | 27   | 3       | [85]       | 1         | 6          |
| MIMAT0000765                  | hsa-miR-335-5p                     | miR-335            | 1              | 0             | 27   | 2        | 27   | 3       | [85]       | 1         | 6          |
| MIMAT0000255                  | hsa-miR-34a-5p                     | miR-34a            | 1              | 0             | 47   | 2        | 10   | 2       | [101]      | 1         | 5          |
| MIMAT0004676/<br>MIMAT0000685 | hsa-miR-34b-3p /<br>hsa-miR-34b-5p | miR-34b            | 1              | 0             | 47   | 2        | 10   | 2       | [101]      | 1         | 5          |
| MIMAT0000686                  | hsa-miR-34c-5p                     | miR-34c            | 1              | 0             | 47   | 2        | 10   | 2       | [101]      | 1         | 5          |
| MIMAT0004761                  | hsa-miR-483-5p                     | miR-483-5p         | 1              | 0             | 25   | 1        | 6    | 0       | [75]       | 1         | 2          |
| MIMAT0004808                  | hsa-miR-625-3p                     | miR-625-3p         | 1              | 0             | 18   | 1        | 7    | 0       | [90]       | 1         | 2          |
| MIMAT0003322                  | hsa-miR-652-3p                     | miR-652            | 4              | 2             | 32   | 2        | 24   | 3       | [77]       | 1         | 8          |

**Note:** MiRNAs were ranked based on the total number of tumor and healthy samples involved and on the number of qRT-PCR assays performed. Accession number and miRNA unique identifier (ID) are reported for each miRNA according to the last miRBase release (miRBase v21).

**No. of qRT-PCR:** total number of additional qRT-PCR assays described in the same paper and/or in different papers and corresponding score (**qRT-PCR score**); **MM:** number of MM samples used

in qRT-PCR analyses and correspondig score (**MM score**); **H**: number of non-cancer controls samples used in qRT-PCR analyses and correspondig score (**H score**); **Ref**: number of references for each miRNAs and corresponding score (**Ref. score**), references in parentheses are numbered according to the reference list; **miRNA Vote**: final score for each miRNA obtained by adding up the scores of the 4 features.

**Table B.** Scoring table of circulating MM-miRNAs from qRT-PCR analyses.

| Accession number | miRBase ID                | miRNAs                | No. of qRT-PCR | qRT-PCR score | MM | MM score | H   | H score | Ref        | Ref score | miRNA Vote |
|------------------|---------------------------|-----------------------|----------------|---------------|----|----------|-----|---------|------------|-----------|------------|
| MIMAT0000099     | hsa-miR-101-3p            | miR-101               | 1              | 0             | 14 | 0        | 10  | 2       | [91]       | 1         | 3          |
| MIMAT0000101     | hsa-miR-103a-3p           | miR-103 / miR-103a-3p | 2              | 1             | 66 | 3        | 77  | 3       | [88], [89] | 2         | 9          |
| MIMAT0000445     | hsa-miR-126-3p            | miR-126               | 2              | 1             | 89 | 3        | 106 | 4       | [85], [86] | 2         | 10         |
| MIMAT0000440     | hsa-miR-191-5p            | miR-191               | 1              | 0             | 14 | 0        | 10  | 2       | [91]       | 1         | 3          |
| MIMAT0000075     | hsa-miR-20a-5p            | miR-20a               | 1              | 0             | 23 | 1        | 25  | 3       | [88]       | 1         | 5          |
| MIMAT0000280     | hsa-miR-223-3p            | miR-223               | 1              | 0             | 14 | 0        | 10  | 2       | [91]       | 1         | 3          |
| MIMAT0000081     | hsa-miR-25-3p             | miR-25                | 1              | 0             | 14 | 0        | 10  | 2       | [91]       | 1         | 3          |
| MIMAT0000083     | hsa-miR-26b-5p            | miR-26b               | 1              | 0             | 14 | 0        | 10  | 2       | [91]       | 1         | 3          |
| MIMAT0000086     | hsa-miR-29a-3p            | miR-29a               | 1              | 0             | 14 | 0        | 10  | 2       | [91]       | 1         | 3          |
| MIMAT0004673     | hsa-miR-29c-5p            | miR-29c*              | 1              | 0             | 45 | 2        | 24  | 3       | [90]       | 1         | 6          |
| MIMAT0000765     | hsa-miR-335-5p            | miR-335               | 1              | 0             | 14 | 0        | 10  | 2       | [91]       | 1         | 3          |
| MIMAT0001627     | hsa-miR-433-3p            | miR-433               | 1              | 0             | 14 | 0        | 10  | 2       | [91]       | 1         | 3          |
| MIMAT0006778     | hsa-miR-516a-3p (unclear) | miR-516               | 1              | 0             | 14 | 0        | 10  | 2       | [91]       | 1         | 3          |
| MIMAT0004808     | hsa-miR-625-3p            | miR-625-3p            | 2              | 1             | 45 | 2        | 24  | 3       | [90]       | 1         | 7          |
| MIMAT0000092     | hsa-miR-92a-3p            | miR-92a               | 1              | 0             | 45 | 2        | 24  | 3       | [90]       | 1         | 6          |

**Note:** MiRNAs were ranked based on the total number of tumor and healthy samples involved and on the number of qRT-PCR assays performed. Accession number and miRNA unique identifier (ID) are reported for each miRNA according to the last miRBase release (miRBase v21).

**No. of qRT-PCR:** total number of additional qRT-PCR assays described in the same paper and/or in different papers and correspondig score (**qRT-PCR score**); **MM:** number of MM samples used in qRT-PCR analyses and correspondig score (**MM score**); **H:** number of non-cancer controls

samples used in qRT-PCR analyses and corresponding score (**H score**); **Ref**: number of references for each miRNAs and corresponding score (**Ref. score**), references in parentheses are numbered according to the reference list; **miRNA Vote**: final score for each miRNA obtained by adding up the scores of the 4 features.

## REFERENCES

1. Moher D, Liberati A, Tetzlaff J, Altman DG. Preferred reporting items for systematic reviews and meta-analyses: the PRISMA statement. *J Clin Epidemiol*. 2009; 62(10):1006–12.
2. Liberati A, Altman DG, Tetzlaff J, Mulrow C, Gøtzsche PC, Ioannidis JPA, Clarke M, Devereaux PJ, Kleijnen J, Moher D. The PRISMA statement for reporting systematic reviews and meta-analyses of studies that evaluate health care interventions: explanation and elaboration. *PLoS Med*. 2009; 6(7):e1000100.
3. Shea BJ, Grimshaw JM, Wells GA, Boers M, Andersson N, Hamel C, Porter AC, Tugwell P, Moher D, Bouter LM. Development of AMSTAR: a measurement tool to assess the methodological quality of systematic reviews. *BMC Med Res Methodol*. 2007; 7:10.
4. Dickersin K, Min YI. NIH clinical trials and publication bias. *Online J Curr Clin Trials*. 1993; Doc No 50:[4967 words; 53 paragraphs].
5. Dwan K, Gamble C, Williamson PR, Kirkham JJ. Systematic review of the empirical evidence of study publication bias and outcome reporting bias - an updated review. *PLoS One*. 2013; 8(7):e66844.
6. Stern JM, Simes RJ. Publication bias: evidence of delayed publication in a cohort study of clinical research projects. *BMJ*. 1997; 315(7109):640–5.
