# Supplementary material for: Diagnostic value of microRNAs in asbestos exposure and malignant mesothelioma: systematic review and qualitative meta-analysis
Source: PubMed Central journal article supplement (PMC5295457; doi:10.18632/oncotarget.9686), 2016-06-01
Supplement: oncotarget-07-58606-s003.pdf [file oncotarget-07-58606-s003.pdf]

**Supplementary Table 2.** Detailed overview of the studies included in the analysis.

| Author, year of publication and reference | Characteristics of tumor samples                                | Tumor content            | Characteristics of control samples                                                                                                                     | Study phase                          | qRT-PCR Platform                                                             | Microarray platform                                            | Relevant findings                                                                                                                                           | GEO Database and MIAME accession numbers |
|-------------------------------------------|-----------------------------------------------------------------|--------------------------|--------------------------------------------------------------------------------------------------------------------------------------------------------|--------------------------------------|------------------------------------------------------------------------------|----------------------------------------------------------------|-------------------------------------------------------------------------------------------------------------------------------------------------------------|------------------------------------------|
| <b>Guled M et al. 2009 [71]</b>           | Fresh tissue: MM (Total, 17: 10 epith, 1 sarc, 5 biph, 1 other) | 30-90%                   | Fresh tissue: pericardium (Total, 1)                                                                                                                   | Screening                            | /                                                                            | Agilent's miRNA microarray system (V.2) - Agilent Technologies | 12 miRNAs exclusively expressed in MM samples, 9 miRNAs exclusively expressed in control samples. (Analysis of association with histopathological subtypes) | /                                        |
| <b>Busacca S et al. 2010 [82]</b>         | Cell lines: MPP-89 (spindle-shaped), REN (epithelial-like)      | /                        | Cell lines: HMC-TERT (immortalized human mesothelial cells-telomerase reverse transcriptase) (Total, 1)                                                | Screening and validation             | TaqMan MicroRNA assays - Applied Biosystem (Ref Gene: U6, calibrator sample) | miRCURY locked nucleic acid [LNA] microarray kit, V.8 - Exiqon | 65 dysregulated miRNAs and 10 miRNAs validated by qRT-PCR                                                                                                   | A-MEXP-1260, E-MEXP-1699                 |
|                                           | FFPE tissue: MM (Total, 24: 8 epith, 8 sarc, 8 biph)            | >80%                     | /                                                                                                                                                      | /                                    | TaqMan MicroRNA assays - Applied Biosystem (Ref Gene: U6, calibrator sample) | /                                                              | 10 miRNAs (analysis of association with histopathological subtypes)                                                                                         |                                          |
| <b>Pass HI et al. 2010 [74]</b>           | Fresh-frozen tissue: MPM (Total, 142: 81 epith, 48 other)       | 129/142 good RNA quality | /                                                                                                                                                      | Training set, test set               | /                                                                            | Nexterion® Slide                                               | Analysis of association with histopathological subtypes and prognosis.                                                                                      | /                                        |
|                                           | 16 MPM samples (8 good prognosis, 8 poor prognosis)             | /                        | /                                                                                                                                                      | Validation                           | qRT-PCR (Ref Gene: miR-181a, miR-let-7c, miR-193a-5p, miR-27b, miR-339-5p)   | /                                                              | Elevated miR-29c* is associated with longer survival                                                                                                        |                                          |
|                                           | Cell lines: HP1, HP3, H2373, H2452, H2591, H2595, H2596, H2461  | /                        | Cell lines: NYU-590.2 (primary mesothelial cell culture), LP9 (TERT-immortalized mesothelial cell line), SV40-transformed mesothelial cell line Met-5A | /                                    | qRT-PCR (Ref Gene: n.a.)                                                     | n.a.                                                           | MiR-29c* is downregulated in MM cell lines                                                                                                                  |                                          |
| <b>Ivanov SV et al. 2010 [84]</b>         | Cell lines: HP1, HP3, H2373, H2452, H2591, H2595, H2596, H2461  | /                        | Cell lines: NYU-590.2 (primary mesothelial cell culture), LP9 (TERT-immortalized mesothelial cell line), SV40-transformed mesothelial cell line Met-5A | Analysis of chromosome deletion      | Loop RT-PCR technology (Ref Gene: n.a.)                                      | Nexterion® Slide                                               | Loss of miR-31 has a pro-tumorigenic effect in MM                                                                                                           | /                                        |
| <b>Benjamin H et al. 2010 [73]</b>        | FFPE tissue: MPM (Total, 47: 29 epith, 6 sarc, 6 biph, 6 other) | Used 33/47               | FFPE tissues: carcinomas (Total, 210/259)                                                                                                              | Biomarker discovery, training phases | qRT-PCR (Ref Gene: U6)                                                       | Nexterion® Slide                                               | Search for miRNAs capable of differentiating MM from carcinoma                                                                                              | /                                        |
|                                           | FFPE tissue: MPM (Used n=14/47)                                 | ≥ 50%                    | FFPE tissues: carcinomas (Total, 49/259)                                                                                                               | Validation phase                     | qRT-PCR (Ref Gene: U6)                                                       | /                                                              | MiR-193-3p, miR-200c, and miR-192 are useful to differentiate MPM from other                                                                                |                                          |

|                                      |                                                                                                                                      |   |                                                                                       |                                               |                                                                                       |                                                                 |                                                                                                      |   |
|--------------------------------------|--------------------------------------------------------------------------------------------------------------------------------------|---|---------------------------------------------------------------------------------------|-----------------------------------------------|---------------------------------------------------------------------------------------|-----------------------------------------------------------------|------------------------------------------------------------------------------------------------------|---|
|                                      |                                                                                                                                      |   |                                                                                       |                                               |                                                                                       |                                                                 | pleural malignancies (sensitivity 100%, specificity 94%)                                             |   |
| <b>Gee GV et al. 2010 [72]</b>       | Fresh tissue: MPM (Total, 15 other)                                                                                                  | / | Fresh tissues: lung adenocarcinoma (Total, 10)                                        | Screening                                     | /                                                                                     | Affimetrix gene chip miRNA microarrays (TGMirV1b520432f)        | Mesothelial-specific downregulation of 7 miRNAs in MPM compared with lung adenocarcinoma             | / |
|                                      | Fresh tissue: MPM (Total, 100: 39 epith, 10 sarc, 19 biph, 32 other)                                                                 | / | Fresh tissue: lung adenocarcinoma (Total, 32) and normal lung tissue (Total, 4)       | Validation                                    | TaqMan MicroRNA assays - Applied Biosystem (Ref Gene: RNU44, RNU48)                   | /                                                               | MPM can be distinguished from lung adenocarcinoma by downregulation of 7 miRs                        |   |
| <b>Balatti V et al. 2011 [81]</b>    | Cell lines: MSTO-211H, MPP-89, IST-MES2, NCI-H2052, NCI-H28 (Total, 5)                                                               | / | Cell lines: HMCs (primary mesothelial cell culture: 4N, 6N, 13N, 16N, 26N) (Total, 5) | Screening                                     | /                                                                                     | Agilent Human microRNA microarray G4470A - Agilent Technologies | MiRNAs found to be dysregulated may be potential MPM targets                                         | / |
|                                      |                                                                                                                                      |   |                                                                                       | Validation                                    | TaqMan MicroRNA assays - Applied Biosystem (Ref Gene: U6)                             | /                                                               |                                                                                                      |   |
| <b>Santarelli L et al. 2011 [85]</b> | Fresh tissue: MPM (Total, 10: 9 epith, 1 sarc)                                                                                       | / | Fresh tissue: adjacent non-cancerous tissues (Total, 5)                               | Screening                                     | /                                                                                     | miRNA qRT-PCR array MAH-102A - SABiosciences (Ref Gene: U6)     | Several downregulated miRs in MPM specimens                                                          | / |
|                                      | Fresh tissue: MPM (Total, 27: 23 epith, 1 sarc, 3 biph)                                                                              | / | FFPE tissue: adjacent non-cancerous tissues (Total, 27)                               | Larger-scale analysis                         | TaqMan MicroRNA assays - Applied Biosystem (Ref Gene: U6)                             | /                                                               | MiR-126 allows to discriminate cancer from non-malignant tissue                                      |   |
|                                      | Serum: MPM patients (Total, 44: 30 epith, 6 sarc, 8 biph) and healthy asbestos-exposed subjects (Total, 196)                         | / | Serum: healthy subjects (Total, 50)                                                   | Validation                                    | TaqMan MicroRNA assays - Applied Biosystem (Ref Gene: U6)                             | /                                                               | MiR-126, in association with SMRPs, was proposed as a marker for early detection of MPM              |   |
| <b>Kubo T et al. 2011 [101]</b>      | Cell lines: NCI-H28, NCI-H290, NCI-H2052, NCI-H2452, HP1, MSTO-211H (Total, 6)                                                       | / | Cell cultures: non-malignant mesothelial primary cultures (Total, 2)                  | Analysis of expression status and methylation | qRT-PCR (Ref Gene: Expression levels of 2 non-malignant mesothelial cells mixed)      | /                                                               | MiR-34b/c expression was reduced in all methylated MPM cell lines and tumors                         | / |
|                                      | Fresh tissue: MPM (Total, 47: 32 epith, 4 sarc, 10 biph, 1 lymph) only 10 samples used for miRNA expression analysis                 | / | Fresh frozen tissue: non-neoplastic pleura from lung cancer patients (Total, 10)      |                                               | qRT-PCR (Ref Gene: Expression levels of two non-malignant mesothelial cells mixed)    | /                                                               |                                                                                                      |   |
| <b>Fassina A et al. 2011 [92]</b>    | FFPE tissue: 74 MPM and 35 peritoneal MM. Total, 109: 58 epith (35 pleural, 23 peritoneal), 25 sarc (18 pl+7 p), 26 biph (21 pl+5 p) | / | /                                                                                     | Analysis of miR-205                           | <i>In Situ</i> Hybridization and NCodeTM miRNA qRT-PCR - Invitrogen (Ref Gene: RNU6B) | /                                                               | MiR-205 downregulation correlated with both the mesenchymal phenotype and a more aggressive behavior | / |
|                                      | Cell lines: H2452, MSTO-211H (Total, 2)                                                                                              | / | Cell line: SV40-transformed mesothelial cell line Met-5A (Total, 1)                   |                                               | NCodeTM miRNA qRT-PCR - Invitrogen (Ref Gene: RNU6B)                                  | /                                                               |                                                                                                      |   |

|                                      |                                                                                                                                               |                              |                                                                                                                                                                                                                                                                    |                                           |                                                                         |                                                            |                                                                                                                                                           |                                                                                                            |
|--------------------------------------|-----------------------------------------------------------------------------------------------------------------------------------------------|------------------------------|--------------------------------------------------------------------------------------------------------------------------------------------------------------------------------------------------------------------------------------------------------------------|-------------------------------------------|-------------------------------------------------------------------------|------------------------------------------------------------|-----------------------------------------------------------------------------------------------------------------------------------------------------------|------------------------------------------------------------------------------------------------------------|
| <b>Nymark P et al. 2011 [70]</b>     | 13 lung tumors from asbestos-exposed patients (large cell lung cancer, adeno-squamous cell carcinoma, small cell lung cancer, adenocarcinoma) | /                            | 8 control patients (hamartoma, lymph node, lymphoid hyperplasia, tuberculoma, inflammatory pseudotumor, lung abscess) and 13 lung tumors from non-exposed patients (large cell lung cancer, adeno-squamous cell carcinoma, small cell lung cancer, adenocarcinoma) | /                                         | /                                                                       | Agilent Human miRNA v2 G2565CA - Agilent Technologies      | 13 novel asbestos-related miRNAs were identified                                                                                                          | Accession number: GSE25508                                                                                 |
| <b>Kemp CD et al. 2012 [93]</b>      | Cell lines: H28, H2052, H2452, NCI-SB-MES1-4 (MPM primary culture) (Total, 4)                                                                 | /                            | Cell lines: LP3, LP9, NCI-SB-NMES1-2 (isolated from normal pleura) (Total, 3)                                                                                                                                                                                      | Association of EZH2 with miRNA expression | qRT-PCR - Applied Biosystems (Ref Gene: RNU44)                          | /                                                          | EZH2 overexpression coincided with decreased miR-101 and miR-26a levels                                                                                   | /                                                                                                          |
|                                      | MPM tissue (n.a.)                                                                                                                             | /                            | Normal pleura tissue (n.a.)                                                                                                                                                                                                                                        |                                           | (n.a.)                                                                  | /                                                          |                                                                                                                                                           |                                                                                                            |
| <b>Weber DG et al. 2012 [88]</b>     | Cellular fraction of peripheral blood: MM patients (Total, 23: 12 epith, 1 sarc, 7 biph, 3 other)                                             | /                            | Cellular fraction of peripheral blood: asbestos-exposed subjects (Total, 17) and healthy subjects (Total, 25)                                                                                                                                                      | Screening and validation                  | TaqMan MicroRNA assays - Applied Biosystem (Ref Gene: miR-125a)         | MirVana miRNA Probe Set v2.0 - Ambion                      | 34 down-regulated and 15 up-regulated miRNAs. A cut-off for miR-103 was determined to discriminate MM patients from asbestos-exposed and healthy subjects | Accession number: GSE29707 <a href="http://www.ncbi.nlm.nih.gov/geo/">http://www.ncbi.nlm.nih.gov/geo/</a> |
| <b>Tomasetti M et al. 2012 [86]</b>  | Serum: MM patients (Total, 45 other)                                                                                                          | /                            | Serum: NSCLC patients (Total, 20) and healthy subjects (Total, 56)                                                                                                                                                                                                 | Clinical validation                       | qRT-PCR - Applied Biosystems (Ref Gene: U6 RNA, cel-miR-39)             | /                                                          | MiR-126 differentiated MM patients from healthy controls and NSCLC from MM, but not NSCLC from control subjects                                           | /                                                                                                          |
| <b>Kirschner MB et al. 2012 [90]</b> | Plasma: MM patients (Total, 5: 3 epith, 2 sarc)                                                                                               | /                            | Plasma: healthy subjects (Total, 3)                                                                                                                                                                                                                                | Screening                                 | /                                                                       | Human 8x15K miRNA Microarray Kit V3 - Agilent Technologies | 15 miRNAs showed significantly higher plasma levels in patients vs. controls; only 3 miRNAs had previously been reported                                  | /                                                                                                          |
|                                      | Plasma: MM patients (Total, 15: 9 epith, 2 sarc, 3 biph, 1 other)                                                                             | Free hemoglobin level < 0.25 | Plasma: healthy subjects (Total, 14)                                                                                                                                                                                                                               | Test                                      | microRNA-specific TaqMan Assays - Applied Biosystems (Ref Gene: miR-16) | /                                                          | MiR-625-3p, miR-29c*, and miR-92a levels were higher in MM patients vs. controls                                                                          |                                                                                                            |
|                                      | Serum: MM patients (Total, 30: 29 epith, 1 other)                                                                                             | Free hemoglobin level < 0.25 | Serum: asbestosis (Total, 10)                                                                                                                                                                                                                                      | Validation                                | microRNA-specific TaqMan Assays - Applied Biosystems (Ref Gene: miR-16) | OpenArray platform - Applied Biosystems                    | MiR-625-3p levels discriminated MM patients from asbestosis patients (accuracy 79.3%, sensitivity 70%, specificity 90%)                                   |                                                                                                            |
|                                      | FFPE tissue-LCM: MM (Total, 18: 15 epith, 3 biph)                                                                                             | LCM                          | FFPE tissue: pericardium (Total, 7)                                                                                                                                                                                                                                | Tissues analysis                          | microRNA-specific TaqMan Assays - Applied Biosystems (Ref Gene: RNU6B)  | /                                                          | Only high miR-625-3p level was confirmed                                                                                                                  |                                                                                                            |
| <b>Andersen M et al. 2012 [83]</b>   | FFPE tissue: MPM (Total, 13 epith)                                                                                                            | /                            | FFPE tissue: diagnostic biopsies (Total, 12) and NNP treat (Total, 13)                                                                                                                                                                                             | Analysis of 4 previously reported miRNAs  | TaqMan MicroRNA Assays - Applied Biosystems (Ref Gene: RNU6B)           | /                                                          | Significant downregulation of miR-17-5p and upregulation of miR-221 (opposite of expression pattern previously reported in cell lines)                    | /                                                                                                          |

|                                    |                                                                                                                    |        |                                                                                                                                      |                                            |                                                                                                                    |                                                            |                                                                                                                                  |                                                                                                            |
|------------------------------------|--------------------------------------------------------------------------------------------------------------------|--------|--------------------------------------------------------------------------------------------------------------------------------------|--------------------------------------------|--------------------------------------------------------------------------------------------------------------------|------------------------------------------------------------|----------------------------------------------------------------------------------------------------------------------------------|------------------------------------------------------------------------------------------------------------|
| <b>Xu Y et al. 2013 [75]</b>       | Fresh frozen tissue: (Total, 25: 18 epith, 3 sarc, 4 biph)                                                         | > 80%  | Fresh tissue: normal pleura (Total, 6)                                                                                               | Screening and validation                   | ViiA™ 7 RT-PCR System - Applied Biosystems (Ref Gene: RNU44)                                                       | Human miRNA BeadChip v2 - Illumina                         | MiR-1 is downregulated in MM and its forced expression induces growth arrest and apoptosis                                       | Accession number: GSE40345 <a href="http://www.ncbi.nlm.nih.gov/geo/">http://www.ncbi.nlm.nih.gov/geo/</a> |
| <b>Reid G et al. 2013 [94]</b>     | FFPE tissue: MPM (Total, 60: 46 epith, 16 biph)                                                                    | /      | FFPE tissue: normal pleura (Total, 23)                                                                                               | Analysis and validation of 4 miRNAs        | microRNA-specific TaqMan assays - Applied Biosystems (Ref Gene: RNU6B)                                             | /                                                          | MiR-15/16 family is downregulated and has tumor suppressor function in MPM                                                       | /                                                                                                          |
|                                    | Cell lines: H2052, H2452, H28, H226, MSTO-211H (Total, 5) and cell cultures: MM05 (primary mesothelioma cell line) | /      | Cell line: MeT-5A (immortalized mesothelial cell line) (Total, 1)                                                                    |                                            |                                                                                                                    |                                                            |                                                                                                                                  |                                                                                                            |
| <b>Cioce M et al. 2013 [76]</b>    | FFPE tissue: MPM (Total, 29: 25 epith, 3 biph, 1 desm)                                                             | /      | FFPE tissue: mesothelial cysts (Total, 12)                                                                                           | Screening                                  | /                                                                                                                  | Human miRNA microarray V2 Rel.16 - Agilent Technologies    | MiR-145 downregulation is a characteristic trait of malignant vs. benign mesothelial tissue                                      | /                                                                                                          |
|                                    | Fresh tissue: MPM (Total, 6), fresh frozen tissue: MPM (Total, 36)                                                 | /      | Fresh-frozen tissue: normal pleura (Total, 14) and matched peritonea (Total, 36)                                                     | Double step validation                     | TaqMan MiRNA Assays - Applied Biosystems (Ref Gene: RNU6B, RNU49)                                                  | /                                                          |                                                                                                                                  |                                                                                                            |
|                                    | Cell lines: H2052, H2452, H28, H226, MSTO-211H (Total, 5) and cell cultures: MM05 (primary mesothelioma cell line) | /      | Cell line (mesothelial cell line, Total, 1)                                                                                          |                                            |                                                                                                                    |                                                            |                                                                                                                                  |                                                                                                            |
| <b>Cheng YY et al. 2013 [95]</b>   | Cell lines: H2052, H2452, H28, H226, MSTO, REN (Total, 6) and cell cultures: MM05 (primary mesothelioma cell line) | /      | Cell cultures: HMCs (normal human mesothelial cells) (Total, 1) and cell line MeT-5A (immortalized mesothelial cell line) (Total, 1) | Screening and validation                   | miRNA-specific TaqMan assays - Life Technologies (Ref Gene: RNU6B)                                                 | Ncode Human miRNA Microarray V3 system - Life Technologies | 4 miRNAs were higher in MPM cells with reduced <i>ZIC1</i> expression                                                            | /                                                                                                          |
|                                    | FFPE tissue-LCM: MPM (Total, 27/31: 27 epith, 4 biph)                                                              | LCM    | /                                                                                                                                    | Analysis of expression status and survival | miRNA-specific TaqMan assays - Life Technologies (Ref Gene: RNU6B)                                                 | /                                                          | Higher expression in tumors correlates with shorter survival                                                                     |                                                                                                            |
| <b>Andersen M et al. 2014 [77]</b> | FFPE tissue: preoperative MPM diagnostic biopsy and post-treatment samples (Total, 5+5 epith)                      | 40-85% | FFPE tissues: NNP post treatment (Total, 5)                                                                                          | Screening                                  | miRCURY LNA Universal RT miRNA Ready-to-Use PCR, Human panels I + II version 2.M - Exiqon A/S (Ref Gene: SNORD49A) | /                                                          | 23 miRNAs are differentially expressed between groups; chemotherapy reduces the differential expression                          | Accession number: GSE54394 <a href="http://www.ncbi.nlm.nih.gov/geo/">http://www.ncbi.nlm.nih.gov/geo/</a> |
|                                    | FFPE tissues: post-treatment MPM samples (Total, 40: 18 epith, 22 biph)                                            | >50%   | FFPE tissues: NNP treat (Total, 14) and PTHX (Total, 5)                                                                              | Double step validation                     | TaqMan miRNA Assays - Life Technologies (Ref Gene: SNORD49A)                                                       | /                                                          | A 4-miRNA (miR-126, miR-143, miR-145, miR-652, downregulated) diagnostic classifier distinguishes MPM from NNP with high overall |                                                                                                            |
|                                    | FFPE tissues: MPM preoperative diagnostic                                                                          | >40%   |                                                                                                                                      |                                            |                                                                                                                    |                                                            |                                                                                                                                  |                                                                                                            |

|                                            | biopsies (Total, 12: 9 epith, 3 biph)                                                                                                                      |       |                                                                                                                      |                                     |                                                                                                                           |                                                                                | accuracy                                                                                                                                                     |                                                                                                            |
|--------------------------------------------|------------------------------------------------------------------------------------------------------------------------------------------------------------|-------|----------------------------------------------------------------------------------------------------------------------|-------------------------------------|---------------------------------------------------------------------------------------------------------------------------|--------------------------------------------------------------------------------|--------------------------------------------------------------------------------------------------------------------------------------------------------------|------------------------------------------------------------------------------------------------------------|
| <b>Riqueleme E et al. 2014 [96]</b>        | Cell lines: H28, H2452, HP10, HP7, HCT4012, H2052, MSTO-211H (Total, 7)                                                                                    | /     | /                                                                                                                    | MiRNA analysis of in 8q24 region    | TaqMan MicroRNA Assays - Applied Biosystems (Ref Gene: U6)                                                                | /                                                                              | Different expression level of miRNAs spanning the <i>PVT1</i> region in MPM cell lines                                                                       | /                                                                                                          |
| <b>Ramírez-Salazar EG et al. 2014 [78]</b> | FFPE macro-dissected MPM tissues: (Total, 5 epith)                                                                                                         | > 80% | FFPE tissues: PP (Total, 4), HP (Total, 5), Ctrl group (adjacent non-cancerous - non-inflammatory tissue, Total, 5). | Profiling                           | /                                                                                                                         | TaqMan Array Human MicroRNA Panel v2.0 (A+B) - Applied Biosystems              | Bioinformatic and network analysis of deregulated miRNAs (19 in MM vs. Ctrl group)                                                                           | /                                                                                                          |
| <b>Matsumoto S et al. 2014 [97]</b>        | FFPE macro-dissected MPM tissues: (Total, 25: 16 epith, 5 sarc, 4 biph)                                                                                    | > 90% | FFPE tissue: RMPs (Total, 20)                                                                                        | Analysis of miR-31                  | TaqMan Universal PCR Master Mix, No AmpErase UNG and TaqMan miRNA-specific Primers - Applied Biosystems (Ref Gene: RNU6B) | /                                                                              | MiR-31 is down-regulated in MM vs. RMP, but miR-31 upregulation in MM patients with sarcomatoid component is significantly associated with a worse prognosis | /                                                                                                          |
| <b>Weber DG et al. 2014 [89]</b>           | Cellular fraction of peripheral blood: MM patients (Total, 43: 28 epith, 5 sarc, 6 biph, 4 other)                                                          | /     | Cellular fraction of periferal blood: asbestos-exposed subjects (Total, 52)                                          | Analysis of miR-103a-3p             | TaqMan miRNA Assays - Life Technologies (Ref Gene: miR-125a)                                                              | /                                                                              | Combination of miR-103a-3p and mesothelin showed 95% sensitivity and 81% specificity in discriminating epith and biph MM from controls                       | /                                                                                                          |
| <b>Kirschner MB et al. 2015 [79]</b>       | FFPE tissues: 8 long-term and 8 short-term MPM survivors (Total, 16 epith)                                                                                 | LCM   | 8 epith short-term vs. 8 epith long-term survivors                                                                   | Discovery set                       | /                                                                                                                         | Agilent Technologies Human 8x15 k microRNA Array Kit V3 - Agilent Technologies | A 6-miRNA signature (miR-score) is associated with longer survival in MM patients undergoing EPP and palliative surgery                                      | Accession number: GSE59180 <a href="http://www.ncbi.nlm.nih.gov/geo/">http://www.ncbi.nlm.nih.gov/geo/</a> |
|                                            | FFPE tissues: MPM EPP including patients who received chemotherapy (13/48) and those who died <8 weeks after surgery (2/48) (Total, 48: 31 epith, 17 biph) | LCM   | Median expression of miRNAs observed across all samples                                                              | Training set                        | Stem-loop primers and hydrolysis probes - Life Technologies (Ref Gene: RNU6B)                                             | /                                                                              |                                                                                                                                                              |                                                                                                            |
|                                            | FFPE tissue: MPM patients undergoing (Total, 43: 25 epith, 5 sarc, 13 biph)                                                                                | LCM   |                                                                                                                      | Validation set                      |                                                                                                                           |                                                                                |                                                                                                                                                              |                                                                                                            |
| <b>Ak G et al. 2015 [80]</b>               | Fresh-frozen tissue: MPM patients (Total, 18: 10 epith, 4 sarc, 4 biph)                                                                                    | > 50% | Fresh-frozen tissue: from BAPE patients (Total, 6)                                                                   | Profiling                           | /                                                                                                                         | TaqMan Human MicroRNA Array Card A - Applied Biosystems                        | 11 significantly up-regulated miRNAs in MPM compared with BAPE                                                                                               | /                                                                                                          |
| <b>Birnie KA et al. 2015 [98]</b>          | Cell lines: NO36, JU77, LO68 (MPM cell lines) (Total, 3)                                                                                                   | /     | Primary human mesothelial cells and Met-5A                                                                           | Profiling and Validation of miR-223 | TaqMan Universal PCR Master Mix, No AmpErase UNG - Life Technologies (Ref Gene: RNU48, RNU44, SNOR202)                    | Taqman Open Array - Life Technologies                                          | MiR-223 showed reduced levels in MPM specimens. MiR-223 targets STMN1, a microtubule regulator associated with MPM.                                          | /                                                                                                          |

|                                    |                                                                                                               |   |                                                                 |                                     |                                                                                                        |                                                        |                                                                                |   |
|------------------------------------|---------------------------------------------------------------------------------------------------------------|---|-----------------------------------------------------------------|-------------------------------------|--------------------------------------------------------------------------------------------------------|--------------------------------------------------------|--------------------------------------------------------------------------------|---|
|                                    | Cell lines: NO36, JU77, LO68, CRL2081, CRL5820 (MPM cell lines) (Total, 5) and mouse MPM cel lines (Total, 3) | / | Human and mouse mesothelial cells                               | Validation of miR-223               | TaqMan Universal PCR Master Mix, No AmpErase UNG - Life Technologies (Ref Gene: RNU48, RNU44, SNOR203) | /                                                      |                                                                                |   |
|                                    | FFPE tissues: MPM (Total, 17: histology n.a.)                                                                 | / | FFPE tissues: pericardial mesothelium samples (Total, 6)        | Validation of miR-223               | TaqMan Universal PCR Master Mix, No AmpErase UNG - Life Technologies (Ref Gene: RNU6B)                 | /                                                      |                                                                                |   |
|                                    | Cells from pleural effusion of MPM patients (histology n.a.)                                                  | / | Cells from pleural effusion of benign diseases                  | Profiling and Validation of miR-223 | TaqMan Universal PCR Master Mix, No AmpErase UNG - Life Technologies (Ref Gene: RNU6B)                 | Taqman Open Array - Life Technologies                  |                                                                                |   |
| <b>Williams M et al. 2015 [99]</b> | FFPE tissues: 59 EEP and 61 P/D (Total, 120: 72 epith, 9 sarc, 39 biph)                                       | / | FFPE tissue: normal mesothelium (Total, 23)                     |                                     | See Reid G et al. 2013 and Kirschner MB et al. 2014                                                    | /                                                      | Levels of mature miR-193a-3p and miR-192 are reduced in MPM                    | / |
|                                    | Cell lines H28, H2052, H2452, H226, MSTO-211H, MM05, VMC23, P31, SPC111 and SPC212 (Total, 10)                | / | MeT-5A, non-small cell lung cancer line A549 and LP9 (Total, 3) |                                     | TaqMan low-density array cards - LifeTechnologies (Ref Gene: RNU48)                                    | /                                                      |                                                                                |   |
| <b>Lamberti M et al. 2015 [91]</b> | Serum: MM patients (Total, 14: 7 epith, 3 sarc, 4 biph)                                                       | / | Serum: non-cancer-related pleural effusion patients (Total, 10) | Profiling and Validation            | TaqMan microRNA Assays - Applied biosystems (Ref Gene: miR-16)                                         | Megaplex Microfluidic Card Pool A - Applied Biosystems | Two distinctive miRNA signatures predicting histotype and survival in patients |   |

**Note:** characteristics of samples, miRNA detection methods, relevant findings, submission of array data to a public repository (GEO or ArrayExpress) are reported. Studies are listed by year of publication. The following abbreviations describe sample characteristics as reported in relevant papers. **BAPE:** benign asbestos-related pleural effusion, **biph:** epithelioid-sarcomatoid, **Ctrl group:** adjacent non-cancerous – non-inflammatory tissue, **DB:** preoperative diagnostic biopsies, **EPP:** extrapleural pneumonectomy, **epith:** epithelioid, **HP:** atypical mesothelial hyperplasia, **lym:** lymphohistiocytic, non-epithelioid or sarcomatoid and mixed, **n.a.:** not available, **NNP:** patient-matched non-neoplastic pleura, **PB:** peripheral blood, **P/D:** pleurectomy ± decortication, **PP:** pachypleuritis/chronic inflammation, **PTHX:** non-neoplastic reactive mesothelial proliferation due to pneumothorax, **RMPs:** reactive mesothelial proliferations, **sarc:** sarcomatoid, **treat:** three series of cisplatin and vinorelbine treatments, **WT:** non-transfected MM cell line.
